# Supplementary material
Source: Elsevier journal article supplement (https://cris.unibo.it/retrieve/handle/11585/1021734/f69d0f72-ee44-4c6b-bdf8-c88467e33b98/mmc1.docx)
Supplement: mmc1 [file mmc1.docx]

**Extended bibliography**

1. Abrahão, J.S., Silva-Fernandes, A.T., Lima, L.S., Campos, R.K., Guedes, M.I.M.C., Cota, M.M.G., Assis, F.L., Borges, I.A., Souza-Júnior, M.F., Lobato, Z.I.P., Bonjardim, C.A., Ferreira, P.C.P., Trindade, G.S., Kroon, E.G., 2010. Vaccinia virus infection in monkeys, Brazilian Amazon. Emerg. Infect. Dis. 16, 976–979. <https://doi.org/10.3201/eid1606.091187>
2. Abreu, F.V.S.D., Lorene Soares Rocha, K., Silva-Oliveira, R., Macedo, M.V., Silva, T.G.M., Gonçalves-dos-Santos, M.E., de Oliveira, C.H., Aquino-Teixeira, S.M., Ottone, V.D.O., da Silva, A.J.J., dos Santos, R.M., Tátila-Ferreira, A., Almeida, M.A.B.D., dos Santos, E., da Cruz Cardoso, J., Campos, A.A.S., Albuquerque, G.R., da Paixão Sevá, A., Ribeiro, B.M., Simonini Teixeira, D., Campos, F.S., Franco, A.C., Roehe, P.M., de Souza Trindade, G., Bretas de Oliveira, D., 2022. Serological Evidence of Orthopoxvirus Infection in Neotropical Primates in Brazil. Pathogens 11. <https://doi.org/10.3390/pathogens11101167>
3. Ahsendorf, H.P., Diesterbeck, U.S., Hotop, S.-K., Winkler, M., Brönstrup, M., Czerny, C.-P., 2022. Characterisation of an Anti-Vaccinia Virus F13 Single Chain Fragment Variable from a Human Anti-Vaccinia Virus-Specific Recombinant Immunoglobulin Library. Viruses 14. https://doi.org/10.3390/v14020197
4. Altenburg, A.F., Van Trierum, S.E., De Bruin, E., De Meulder, D., Van De Sandt, C.E., Van Der Klis, F.R.M., Fouchier, R.A.M., Koopmans, M.P.G., Rimmelzwaan, G.F., De Vries, R.D., 2018. Effects of pre-existing orthopoxvirus-specific immunity on the performance of Modified Vaccinia virus Ankara-based influenza vaccines. Sci. Rep. 8. <https://doi.org/10.1038/s41598-018-24820-2>
5. Andreani, J., Arnault, J.-P., Bou Khalil, J.Y., Abrahão, J., Tomei, E., Vial, E., Le Bideau, M., Raoult, D., La Scola, B., 2019. Atypical cowpox virus infection in smallpox-vaccinated patient, France. Emerg. Infect. Dis. 25, 212–219. <https://doi.org/10.3201/eid2502.171433>
6. Antinori, A., Mazzotta, V., Vita, S., Carletti, F., Tacconi, D., Lapini, L.E., D’Abramo, A., Cicalini, S., Lapa, D., Pittalis, S., Puro, V., Capparuccia, M.R., Giombini, E., Gruber, C.E.M., Garbuglia, A.R., Marani, A., Vairo, F., Girardi, E., Vaia, F., Nicastri, E., Agresta, A., Baldini, F., Bartoli, T.A., Beccacece, A., Bellagamba, R., Bettini, A., Bevilacqua, N., Camici, M., Colavita, F., Corpolongo, A., De Carli, G., De Zottis, F., Faraglia, F., Francalancia, M., Fusco, C.M., Gagliardini, R., Gebremeskel, S., Giancola, M.L., Gramigna, G., Grilli, E., Grisetti, S., Lanini, S., Maffongelli, G., Mariano, A., Mastrorosa, I., Matusali, G., Meschi, S., Minosse, C., Moccione, M., Mondi, A., Mondillo, V., Orchi, N., Ottou, S., Pinnetti, C., Rosati, S., Rueca, M., Scorzolini, L., Specchiarello, E., Vergori, A., 2022. Epidemiological, clinical and virological characteristics of four cases of monkeypox support transmission through sexual contact, Italy, May 2022. Eurosurveillance 27. <https://doi.org/10.2807/1560-7917.ES.2022.27.22.2200421>
7. Atoui, A., Jourdain, F., Mouly, D., Cordevant, C., Chesnot, T., Gassilloud, B., 2023. A review on mpox (monkeypox) virus shedding in wastewater and its persistence evaluation in environmental samples. Case Studies in Chemical and Environmental Engineering 7. <https://doi.org/10.1016/j.cscee.2023.100315>
8. Barbosa Costa, G., Silva de Oliveira, J., Townsend, M.B., Carson, W.C., Borges, I.A., McCollum, A.M., Kroon, E.G., Satheshkumar, P.S., Reynolds, M.G., Nakazawa, Y.J., Trindade, G.S., 2021. Educational approach to prevent the burden of vaccinia virus infections in a bovine vaccinia endemic area in Brazil. Pathogens 10. <https://doi.org/10.3390/pathogens10050511>
9. Barocas, J.A., Strathdee, S.A., 2022. Beyond Sex: Human Monkeypox Virus is an Emerging Threat to Marginalized Populations. Open Forum Infect. Dis. 9. <https://doi.org/10.1093/ofid/ofac551>
10. Basit, A., Zain, J.M., Mojahid, H.Z., Ali, M., 2022. Genesis of Monkeypox. Journal of Pure and Applied Microbiology 16, 3192–3197. <https://doi.org/10.22207/JPAM.16.SPL1.19>
11. Beatty, N.L., Small, C., Degener, T., Henao Martinez, A.F., 2022. Monkeypox infection and resolution after treatment with tecovirimat in two patients with HIV disease. Ther. Adv. Infect. Dis. 9. <https://doi.org/10.1177/20499361221138349>
12. Biswas, S., Dicks, M.D.J., Long, C.A., Remarque, E.J., Siani, L., Colloca, S., Cottingham, M.G., Holder, A.A., Gilbert, S.C., Hill, A.V.S., Draper, S.J., 2011. Transgene optimization, immunogenicity and in vitro efficacy of viral vectored vaccines expressing two alleles of plasmodium falciparum AMA1. PLoS ONE 6. <https://doi.org/10.1371/journal.pone.0020977>
13. Borges, I.A., McCollum, A.M., Mehal, J.M., Haberling, D., Dutra, L.A.L., Vieira, F.N., Andrade, L.A.O., Kroon, E.G., Holman, R.C., Reynolds, M.G., Trindade, G.S., 2017. Dairy production practices and associated risks for bovine vaccinia exposure in cattle, Brazil. New Microbes and New Infections 20, 43–50. <https://doi.org/10.1016/j.nmni.2017.08.004>
14. Borges, I.A., Reynolds, M.G., McCollum, A.M., Figueiredo, P.O., Ambrosio, L.L.D., Vieira, F.N., Costa, G.B., Matos, A.C.D., de Andrade Almeida, V.M., Ferreira, P.C.P., Lobato, Z.I.P., dos Reis, J.K.P., Kroon, E.G., Trindade, G.S., 2018. Serological evidence of Orthopoxvirus circulation among equids, southeast Brazil. Frontiers in Microbiology 9. <https://doi.org/10.3389/fmicb.2018.00402>
15. Brouillard, P., Valin-Thorburn, A., Provost, Y., Chakravarti, A., Honos, G., Tournoux, F., Tremblay, C., 2022. Monkeypox associated myocarditis: A case report. IDCases 30. <https://doi.org/10.1016/j.idcr.2022.e01628>
16. Cardeti, G., Brozzi, A., Eleni, C., Polici, N., D’Alterio, G., Carletti, F., Scicluna, M.T., Castilletti, C., Capobianchi, M.R., di Caro, A., Autorino, G.L., Amadde, D., 2011. Cowpox virus in Llama, Italy. Emerging Infectious Diseases 17, 1513–1515. <https://doi.org/10.3201/eid1708.101912>
17. Caria, J., Pinto, R., Leal, E., Almeida, V., Cristóvão, G., Gonçalves, A.C., Torres, M., Santos, M.B., Pinheiro, H., Póvoas, D., Seixas, D., Lino, S., Cardoso, O., Manata, M.J., Virgolino, A., Maltez, F., 2022. Clinical and Epidemiological Features of Hospitalized and Ambulatory Patients with Human Monkeypox Infection: A Retrospective Observational Study in Portugal. Infectious Disease Reports 14, 810–823. <https://doi.org/10.3390/idr14060083>
18. Cassir, N., Cardona, F., Tissot-Dupont, H., Bruel, C., Doudier, B., Lahouel, S., Bendamardji, K., Boschi, C., Aherfi, S., Edouard, S., Lagier, J.-C., Colson, P., Gautret, P., Fournier, P.-E., Parola, P., Brouqui, P., La-Scola, B., Million, M., 2022. Observational Cohort Study of Evolving Epidemiologic, Clinical, and Virologic Features of Monkeypox in Southern France. Emerg. Infect. Dis. 28, 2409–2415. <https://doi.org/10.3201/eid2812.221440>
19. Castanares, G.-G., D’Assumpcao, C., Fang, M., McPheeters, R., Heidari, A., 2023. Primary Mpox and Secondary Syphilis in an HIV Patient: A Community Hospital Experience. J. Investig. Med. High Impact Case Rep. 11. <https://doi.org/10.1177/23247096231165739>
20. Chmel, M., Bartoš, O., Kabíčková, H., Pajer, P., Kubíčková, P., Novotná, I., Bartovská, Z., Zlámal, M., Burantová, A., Holub, M., Jiřincová, H., Nagy, A., Černíková, L., Zákoucká, H., Dresler, J., 2022. Retrospective Analysis Revealed an April Occurrence of Monkeypox in the Czech Republic. Viruses 14. <https://doi.org/10.3390/v14081773>
21. Choudhary, O.P., Chopra, H., Shafaati, M., Dhawan, M., Metwally, A.A., Saied, A.A., Rabaan, A.A., Alhumaid, S., Al Mutair, A., Sarkar, R., 2022. Reverse zoonosis and its relevance to the monkeypox outbreak 2022. New Microbes and New Infections 49–50. <https://doi.org/10.1016/j.nmni.2022.101049>
22. Chowdhury, P.P.D., Haque, M.A., Ahamed, B., Tanbir, M., Islam, M.R., 2022. A Brief Report on Monkeypox Outbreak 2022: Historical Perspective and Disease Pathogenesis. Clinical Pathology 15. <https://doi.org/10.1177/2632010X221131660>
23. Costa, G.B., Augusto, L.T.S., Leite, J.A., Ferreira, P.C.P., Bonjardim, C.A., Abrahão, J.S., Kroon, E.G., Moreno, E.C., Trindade, G.D.S., 2016. Seroprevalence of Orthopoxvirus in rural Brazil: Insights into anti-OPV immunity status and its implications for emergent zoonotic OPV. Virology Journal 13. <https://doi.org/10.1186/s12985-016-0575-6>
24. Costa, G.B., de Almeida, L.R., Cerqueira, A.G.R., Mesquita, W.U., de Oliveira, J.S., Miranda, J.B., Saraiva-Silva, A.T., Abrahão, J.S., Drumond, B.P., Kroon, E.G., Pereira, P.L.L., de Magalhães Soares, D.F., de Souza Trindade, G., 2018. Vaccinia virus among domestic dogs and wild coatis, Brazil, 2013–2015. Emerging Infectious Diseases 24, 2338–2342. <https://doi.org/10.3201/eid2412.171584>
25. da Silva, T.G., Lima, M.S., de Castro, A.M.M.G., Martins, M.S.N., Castiglioni, V.C., Del Fava, C., Okuda, L.H., Pituco, E.M., 2018. Bovine vaccinia in dairy cattle and suspicion of vesicular disease on milkers in Brazil. Ciencia Rural 48. <https://doi.org/10.1590/0103-8478cr20170723>
26. Damle, A.S., Gaikwad, A.A., Patwardhan, N.S., Duthade, M.M., Sheikh, N.S., Deshmukh, D.G., 2011. Outbreak of human buffalopox infection. Journal of Global Infectious Diseases 3, 187–188. <https://doi.org/10.4103/0974-777X.81698>
27. Daneji, S.M., Aminu, A., Borodo, A.M., Dayyab, F.M., 2022. Monkeypox in human pregnancy: an overview. AJOG Glob. Rep. 2. <https://doi.org/10.1016/j.xagr.2022.100130>
28. de Assis, F.L., Vinhote, W.M., Barbosa, J.D., de Oliveira, C.H.S., de Oliveira, C.M.G., Campos, K.F., Silva, N.S., Trindade, G.S., Abrahão, J.S., Kroon, E.G., 2013. Reemergence of vaccinia virus during zoonotic outbreak, Pará State, Brazil. Emerging Infectious Diseases 19, 2017–2020. <https://doi.org/10.3201/eid1912.130589>
29. De Figueiredo, P.O., Da Silva-Fernandes, A.T., Fernandes Mota, B.E., Costa, G.B., Borges, I.A., Ferreira, P.C., Abrahão, J.S., Braga, E.M., Kroon, E.G., De Trindade, G.S., 2015. Evaluating anti-orthopoxvirus antibodies in individuals from brazilian rural areas prior to the bovine vaccinia era. Memorias do Instituto Oswaldo Cruz 110, 804. <https://doi.org/10.1590/0074-02760150215>
30. de Graaf, H., Payne, R.O., Taylor, I., Miura, K., Long, C.A., Elias, S.C., Zaric, M., Minassian, A.M., Silk, S.E., Li, L., Poulton, I.D., Baker, M., Draper, S.J., Gbesemete, D., Brendish, N.J., Martins, F., Marini, A., Mekhaiel, D., Edwards, N.J., Roberts, R., Vekemans, J., Moyle, S., Faust, S.N., Berrie, E., Lawrie, A.M., Hill, F., Hill, A.V.S., Biswas, S., 2021. Safety and Immunogenicity of ChAd63/MVA Pfs25-IMX313 in a Phase I First-in-Human Trial. Front. Immunol. 12. <https://doi.org/10.3389/fimmu.2021.694759>
31. De Sant’Ana, F.J.F., Leal, A.D.A., Rabelo, R.E., Vulcani, V.A.S., Junior, J.A.F., Cargnelutti, J.F., Flores, E.F., 2013. Outbreaks of vesicular disease caused by vaccinia virus in dairy cattle from goiás state, brazil (2010-2012). Pesqui. Vet. Bras. 33, 860–866. <https://doi.org/10.1590/S0100-736X2013000700006>
32. de Sousa, D., Frade, J., Patrocínio, J., Borges-Costa, J., Filipe, P., 2022. Monkeypox infection and bacterial cellulitis: a complication to look for. Int. J. Infect. Dis. 123, 180–182. [https://doi.org/10.1016/j.ijid.2 31022.08.024](https://doi.org/10.1016/j.ijid.2022.08.024)
33. De Souza Trindade, G., Da Fonseca, F.G., Marques, J.T., Nogueira, M.L., Mendes, L.C.N., Borges, A.S., Peiró, J.R., Pituco, E.M., Bonjardim, C.A., Ferreira, P.C.P., Kroon, E.G., 2003. Araçatuba virus: A vaccinialike virus associated with infection in humans and cattle. Emerg. Infect. Dis. 9, 155–160. <https://doi.org/10.3201/eid0902.020244>
34. Desai, A.N., Thompson, G.R., Dodson, D., Neumeister, S.M., Arutyunova, A.M., Trigg, K., Blumberg, D., Cohen, S.H., 2023. Mpox Infection in Children-Infection Control Implications for Household Contacts. Open Forum Infect. Dis. 10. <https://doi.org/10.1093/ofid/ofad003>
35. Domingos, I.J.S., Rocha, K.L.S., Graciano, J.M., Almeida, L.R., Doty, J.B., Paglia, A.P., Oliveira, D.B., Nakazawa, Y.J., Trindade, G.D.S., 2023. Orthopoxvirus Circulation in an Endemic Area in Brazil: Investigation of Infections in Small Mammals during an Absence of Outbreaks. Viruses 15. <https://doi.org/10.3390/v15040842>
36. Doshi, R.H., Guagliardo, S.A.J., Doty, J.B., Babeaux, A.D., Matheny, A., Burgado, J., Townsend, M.B., Morgan, C.N., Satheshkumar, P.S., Ndakala, N., Kanjingankolo, T., Kitembo, L., Malekani, J., Kalemba, L., Pukuta, E., N’kaya, T., Kangoula, F., Moses, C., McCollum, A.M., Reynolds, M.G., Mombouli, J.-V., Nakazawa, Y., Petersen, B.W., 2019. Epidemiologic and ecologic investigations of Monkeypox, Likouala department, Republic of the Congo, 2017. Emerging Infectious Diseases 25, 273–281. <https://doi.org/10.3201/eid2502.181222>
37. Doty, J.B., Malekani, J.M., Kalemba, L.N., Stanley, W.T., Monroe, B.P., Nakazawa, Y.U., Mauldin, M.R., Bakambana, T.L., Dja Liyandja, T.L., Braden, Z.H., Wallace, R.M., Malekani, D.V., McCollum, A.M., Gallardo-Romero, N., Kondas, A., Townsend Peterson, A., Osorio, J.E., Rocke, T.E., Karem, K.L., Emerson, G.L., Carroll, D.S., 2017. Assessing monkeypox virus prevalence in small mammals at the human–animal interface in the democratic republic of the congo. Viruses 9. <https://doi.org/10.3390/v9100283>
38. Douglas, K.O., Cayol, C., Forbes, K.M., Samuels, T.A., Vapalahti, O., Sironen, T., Gittens-St Hilaire, M., 2021. Serological evidence of multiple zoonotic viral infections among wild rodents in Barbados. Pathogens 10. <https://doi.org/10.3390/pathogens10060663>
39. Ducournau, C., Ferrier-Rembert, A., Ferraris, O., Joffre, A., Favier, A.-L., Flusin, O., Van Cauteren, D., Kecir, K., Auburtin, B., Védy, S., Bessaud, M., Peyrefitte, C.N., 2013. Concomitant human infections with 2 cowpox virus strains in related cases, France, 2011. Emerging Infectious Diseases 19, 1996–1999. <https://doi.org/10.3201/eid1912.130256>
40. Dumont, C., Irenge, L.M., Magazani, E.K., Garin, D., Muyembe, J.-J.T., Bentahir, M., Gala, J.-L., 2014. Simple technique for in field samples collection in the cases of skin rash illness and subsequent PCR detection of orthopoxviruses and varicella zoster virus. PLoS ONE 9. <https://doi.org/10.1371/journal.pone.0096930>
41. Dumonteil, E., Herrera, C., Sabino-Santos, G., 2023. Monkeypox Virus Evolution before 2022 Outbreak. Emerg. Infect. Dis. 29, 451–453. <https://doi.org/10.3201/eid2902.220962>
42. Duque, M.P., Ribeiro, S., Martins, J.V., Casaca, P., Leite, P.P., Tavares, M., Mansinho, K., Duque, L.M., Fernandes, C., Cordeiro, R., Borrego, M.J., Pelerito, A., de Carvalho, I.L., Núncio, S., Manageiro, V., Minetti, C., Machado, J., Haussig, J.M., Croci, R., Spiteri, G., Casal, A.S., Mendes, D., Souto, T., Pocinho, S., Fernandes, T., Firme, A., Vasconcelos, P., Freitas, G., 2022. Ongoing monkeypox virus outbreak, Portugal, 29 April to 23 May 2022. Eurosurveillance 27. <https://doi.org/10.2807/1560-7917.ES.2022.27.22.2200424>
43. Eder, I., Vollmar, P., Pfeffer, M., Naether, P., Rodloff, A.C., Meyer, H., 2017a. Two distinct clinical courses of human cowpox, Germany, 2015. Viruses 9. <https://doi.org/10.3390/v9120375>
44. Erez, N., Achdout, H., Milrot, E., Schwartz, Y., Wiener-Well, Y., Paran, N., Politi, B., Tamir, H., Israely, T., Weiss, S., Beth-Din, A., Shifman, O., Israeli, O., Yitzhaki, S., Shapira, S.C., Melamed, S., Schwartz, E., 2019. Diagnosis of imported monkeypox, Israel, 2018. Emerg. Infect. Dis. 25, 980–983. <https://doi.org/10.3201/eid2505.190076>
45. Ezzat, D., Barcellini, B., Meier, J., Duc-Ha, E., Mathis, J., 2023. Ulcerating vulvar lesions revealing a rare female case of monkeypox in Switzerland. AJOG Global Reports 3. <https://doi.org/10.1016/j.xagr.2022.100155>
46. Faherty, E.A.G., Teran, R.A., Black, S.R., Chundi, V., Smith, S., Bernhardt, B., Weber, E., Brassil, B., Ruestow, P., Kerins, J.L., 2023. Mpox among Public Festival Attendees, Chicago, Illinois, USA, July-August 2022. Emerg. Infect. Dis. 29, 1059–1061. <https://doi.org/10.3201/eid2905.221797>
47. Falendysz, E.A., Lopera, J.G., Doty, J.B., Nakazawa, Y., Crill, C., Lorenzsonn, F., Kalemba, L.N., Ronderos, M.D., Mejia, A., Malekani, J.M., Karem, K., Carroll, D.S., Osorio, J.E., Rocke, T.E., 2017. Characterization of Monkeypox virus infection in African rope squirrels (Funisciurus sp.). PLoS Neglected Tropical Diseases 11. <https://doi.org/10.1371/journal.pntd.0005809>
48. Favier, A.-L., Flusin, O., Lepreux, S., Fleury, H., Labrèze, C., Georges, A., Crance, J.-M., Boralevi, F., 2011. Necrotic ulcerated lesion in a young boy caused by cowpox virus infection. Case Reports in Dermatology 3, 186–194. <https://doi.org/10.1159/000331426>
49. Ferrer, P.E., Potthoff, S., Kirschnek, S., Gasteiger, G., Kastenmüller, W., Ludwig, H., Paschen, S.A., Villunger, A., Sutter, G., Drexler, I., Häcker, G., 2011. Induction of noxa-mediated apoptosis by modified vaccinia virus ankara depends on viral recognition by cytosolic helicases, leading to IRF-3/IFN-β-dependent induction of pro-apoptotic noxa. PLoS Pathog. 7. <https://doi.org/10.1371/journal.ppat.1002083>
50. Forni, D., Cagliani, R., Molteni, C., Clerici, M., Sironi, M., 2022. Monkeypox virus: The changing facets of a zoonotic pathogen. Infection, Genetics and Evolution 105. <https://doi.org/10.1016/j.meegid.2022.105372>
51. Franco-Luiz, A.P.M., Oliveira, D.B., Fagundes Pereira, A., Gasparini, M.C.S., Bonjardim, C.A., Ferreira, P.C.P., de Souza Trindade, G., Puentes, R., Furtado, A., Santos Abrahão, J., Kroon, E.G., 2016. Detection of vaccinia virus in dairy cattle serum samples from 2009, Uruguay. Emerging Infectious Diseases 22, 2174–2177. <https://doi.org/10.3201/eid2212.160447>
52. Franke, A., Pfaff, F., Jenckel, M., Hoffmann, B., Höper, D., Antwerpen, M., Meyer, H., Beer, M., Hoffmann, D., 2017. Classification of cowpox viruses into several distinct clades and identification of a novel lineage. Viruses 9. <https://doi.org/10.3390/v9060142>
53. Fusco, D., Martínez-Pérez, G.Z., Remkes, A., De Pascali, A.M., Ortalli, M., Varani, S., Scagliarini, A., 2022. A sex and gender perspective for neglected zoonotic diseases. Front. Microbiol. 13, 1031683. <https://doi.org/10.3389/fmicb.2022.1031683>
54. Garber, D.A., O’Mara, L.A., Zhao, J., Gangadhara, S., An, I.C., Feinberg, M.B., 2009. Expanding the repertoire of modified vaccinia Ankara-based vaccine vectors via genetic complementation strategies. PLoS ONE 4. <https://doi.org/10.1371/journal.pone.0005445>
55. Gaspari, V., Rossini, G., Robuffo, S., Rapparini, L., Scagliarini, A., Mistral De Pascali, A., Piraccini, B.M., Lazzarotto, T., 2023. Monkeypox Outbreak 2022: Clinical and Virological Features of 30 Patients at the Sexually Transmitted Diseases Centre of Sant’ Orsola Hospital, Bologna, Northeastern Italy. J Clin Microbiol 61, e01365-22. <https://doi.org/10.1128/jcm.01365-22>
56. Ghasemi, R., Lazear, E., Wang, X., Arefanian, S., Zheleznyak, A., Carreno, B.M., Higashikubo, R., Gelman, A.E., Kreisel, D., Fremont, D.H., Krupnick, A.S., 2016. Selective targeting of IL-2 to NKG2D bearing cells for improved immunotherapy. Nature Communications 7. <https://doi.org/10.1038/ncomms12878>
57. Guan, H., Gul, I., Xiao, C., Ma, S., Liang, Y., Yu, D., Liu, Y., Liu, H., Zhang, C.Y., Li, J., Qin, P., 2023. Emergence, phylogeography, and adaptive evolution of mpox virus. New Microbes and New Infections 52. <https://doi.org/10.1016/j.nmni.2023.101102>
58. Guarner, J., Johnson, B.J., Paddock, C.D., Shieh, W.-J., Goldsmith, C.S., Reynolds, M.G., Damon, I.K., Regnery, R.L., Zaki, S.R., Greer, P., Packard, M.M., Lee, W., Olson, V., Kline, R., Li, Y., Stempora, L., 2004. Monkeypox Transmission and Pathogenesis in Prairie Dogs. Emerg. Infect. Dis. 10, 426–431. <https://doi.org/10.3201/eid1003.030878>
59. Hans, G.H., Wildemeersch, D., Meeus, I., 2022. Integrated Analgesic Care in the Current Human Monkeypox Outbreak: Perspectives on an Integrated and Holistic Approach Combining Old Allies with Innovative Technologies. Medicina (Lithuania) 58. <https://doi.org/10.3390/medicina58101454>
60. Huggett, J.F., French, D., O’Sullivan, D.M., Moran-Gilad, J., Zumla, A., 2022. Monkeypox: another test for PCR. Eurosurveillance 27. <https://doi.org/10.2807/1560-7917.ES.2022.27.32.2200497>
61. Hughes, C.M., Blythe, D., Li, Y., Reddy, R., Jordan, C., Edwards, C., Adams, C., Conners, H., Rasa, C., Wilby, S., Russell, J., Russo, K.S., Somsel, P., Wiedbrauk, D.L., Dougherty, C., Allen, C., Frace, M., Emerson, G., Olson, V.A., Smith, S.K., Braden, Z., Abel, J., Davidson, W., Reynolds, M., Damon, I.K., 2011. Vaccinia virus infections in martial arts gym, Maryland, USA, 2008. Emerg. Infect. Dis. 17, 730–733. <https://doi.org/10.3201/eid1704.101010>
62. Hutin, Y.J., Williams, R.J., Malfait, P., Pebody, R., Loparev, V.N., Ropp, S.L., Rodriguez, M., Knight, J.C., Tshioko, F.K., Khan, A.S., Szczeniowski, M.V., Esposito, J.J., 2001. Outbreak of human monkeypox, Democratic Republic of Congo, 1996 to 1997. Emerging infectious diseases 7, 434–438. <https://doi.org/10.3201/eid0703.017311>
63. Hutson, C.L., Abel, J.A., Carroll, D.S., Olson, V.A., Braden, Z.H., Hughes, C.M., Dillon, M., Hopkins, C., Karem, K.L., Damon, I.K., Osorio, J.E., 2010. Comparison of West African and Congo Basin monkeypox viruses in BALB/c and C57BL/6 mice. PLoS ONE 5. <https://doi.org/10.1371/journal.pone.0008912>
64. Hutson, C.L., Carroll, D.S., Gallardo-Romero, N., Drew, C., Zaki, S.R., Nagy, T., Hughes, C., Olson, V.A., Sanders, J., Patel, N., Smith, S.K., Keckler, M.S., Karem, K., Damon, I.K., 2015. Comparison of Monkeypox Virus Clade Kinetics and Pathology within the Prairie Dog Animal Model Using a Serial Sacrifice Study Design. BioMed Research International 2015. <https://doi.org/10.1155/2015/965710>
65. Hutson, C.L., Carroll, D.S., Gallardo-Romero, N., Weiss, S., Clemmons, C., Hughes, C.M., Salzer, J.S., Olson, V.A., Abel, J., Karem, K.L., Damon, I.K., 2011. Monkeypox disease transmission in an experimental setting: Prairie dog animal model. PLoS ONE 6. <https://doi.org/10.1371/journal.pone.0028295>
66. Hutson, C.L., Gallardo-Romero, N., Carroll, D.S., Clemmons, C., Salzer, J.S., Nagy, T., Hughes, C.M., Olson, V.A., Karem, K.L., Damon, I.K., 2013. Transmissibility of the Monkeypox Virus Clades via Respiratory Transmission: Investigation Using the Prairie Dog-Monkeypox Virus Challenge System. PLoS ONE 8. <https://doi.org/10.1371/journal.pone.0055488>
67. Israely, T., Paran, N., Erez, N., Cherry, L., Tamir, H., Achdout, H., Politi, B., Israeli, O., Zaide, G., Cohen-Gihon, I., Vitner, E.B., Lustig, S., Melamed, S., 2019. Differential response following infection of mouse cns with virulent and attenuated vaccinia virus strains. Vaccines 7. <https://doi.org/10.3390/vaccines7010019>
68. IV Santaliz-Ruiz, L.E., Pabón-González, F., Colón-Fontánez, F., 2023. Monkeypox induced acute myocarditis in a young healthy adult. JAAD Case Rep. 34, 5–6. <https://doi.org/10.1016/j.jdcr.2023.01.018>
69. Jalilian, S., Bastani, M.-N., 2022. The Mpox, serious menace, or paper tiger? Iran. J. Microbiol. 14, 770–777. <https://doi.org/10.18502/ijm.v14i6.11251>
70. Jamil, H., Tariq, W., Tahir, M.J., Mahfooz, R.S., Asghar, M.S., Ahmed, A., 2022. Human monkeypox expansion from the endemic to non-endemic regions: Control measures. Ann. Med. Surg. 79. <https://doi.org/10.1016/j.amsu.2022.104048>
71. Jang, W., Kandimalla, L., Rajan, S., Abreu, R., Campos, J.E., 2023. Monkeypox in an immunocompromised patient with underlying human immunodeficiency virus and syphilis infections in Southern Florida of the United States: a case report. AIDS Res. Ther. 20. <https://doi.org/10.1186/s12981-023-00504-4>
72. Jeske, K., Weber, S., Pfaff, F., Imholt, C., Jacob, J., Beer, M., Ulrich, R.G., Hoffmann, D., 2019. Molecular detection and characterization of the first cowpox virus isolate derived from a bank vole. Viruses 11. <https://doi.org/10.3390/v11111075>
73. Karim, A.M., Kwon, J.E., Karim, M.A., Iftikhar, H., Yasir, M., Ullah, I., Kang, S.C., 2022. Comprehensive update on the monkeypox outbreak. Front. Microbiol. 13. <https://doi.org/10.3389/fmicb.2022.1037583>
74. Kaswa, R., Nair, A., von Pressentin, K.B., 2022. The outbreak of monkeypox: A clinical overview. S. Afr. Fam. Pract. 64. <https://doi.org/10.4102/SAFP.V64I1.5613>
75. Khlusevich, Y., Matveev, A., Emelyanova, L., Goncharova, E., Golosova, N., Pereverzev, I., Tikunova, N., 2022. New p35 (H3L) Epitope Involved in Vaccinia Virus Neutralization and Its Deimmunization. Viruses 14. <https://doi.org/10.3390/v14061224>
76. Kim, J.-W., Lee, M., Shin, H., Choi, C.-H., Choi, M.-M., Kim, J.W., Yi, H., Yoo, C.-K., Rhie, G.-E., 2022. Isolation and identification of monkeypox virus MPXV-ROK-P1-2022 from the first case in the Republic of Korea. Osong Public Health and Research Perspectives 13, 308–311. <https://doi.org/10.24171/j.phrp.2022.0232>
77. Kukreja, S., Ochani, S., Kalwar, A., Lohana, S., Ullah, K., 2022. Re-administration of SmallPox vaccine against MonkeyPox among general population; after more 30 Years of vaccine cessation by WHO. Annals of Medicine and Surgery 81. <https://doi.org/10.1016/j.amsu.2022.104519>
78. Kumar, R., Nagar, S., Haider, S., Sood, U., Ponnusamy, K., Dhingra, G.G., Anand, S., Dua, A., Singh, M., Kumar, R., Sengar, M., Singh, I.K., Lal, R., 2023. Monkeypox virus: phylogenomics, host-pathogen interactome and mutational cascade. Microb Genom 9. <https://doi.org/10.1099/mgen.0.000987>
79. Kurth, A., Straube, M., Kucska, A., Dunsche, A.J., Meyer, H., Nitsche, A., 2009. Cowpox virus outbreak in banded mongooses (mungos mungo) and jaguarundis (Herpailurus yagouaroundi) with a time-delayed infection to humans. PLoS ONE 4. <https://doi.org/10.1371/journal.pone.0006883>
80. Lewis, A., Josiowicz, A., Riade, S.M.H., Tous, M., Palacios, G., Cisterna, D.M., 2022. Introduction and Differential Diagnosis of Monkeypox in Argentina, 2022. Emerg. Infect. Dis. 28, 2123–2125. <https://doi.org/10.3201/eid2810.221075>
81. Lima, M.T., Oliveira, G.P., Afonso, J.A.B., Souto, R.J.C., De Mendonça, C.L., Dantas, A.F.M., Abrahao, J.S., Kroon, E.G., 2019. An update on the known host range of the brazilian vaccinia virus: An outbreak in Buffalo Calves. Frontiers in Microbiology 10. <https://doi.org/10.3389/fmicb.2018.03327>
82. Lopes, P.S., Haddad, G.R., Miot, H.A., 2022. Sexually-transmitted monkeypox: report of two cases. Anais Brasileiros de Dermatologia 97, 783–785. <https://doi.org/10.1016/j.abd.2022.08.002>
83. Mande, G., Akonda, I., De Weggheleire, A., Brosius, I., Liesenborghs, L., Bottieau, E., Ross, N., Gembu, G.-C., Colebunders, R., Verheyen, E., Ngonda, D., Leirs, H., Laudisoit, A., 2022. Enhanced surveillance of monkeypox in Bas-Uélé, Democratic Republic of Congo: the limitations of symptom-based case definitions. Int. J. Infect. Dis. 122, 647–655. <https://doi.org/10.1016/j.ijid.2022.06.060>
84. Manoharan, A., Braz, B.X., McBride, A., Hernandez, S., Balfour, M., Quiroz, T., Powell, A., Rodriguez, A., Morris, S., Gonzales-Zamora, J.A., 2022. Severe monkeypox with superimposed bacterial infection in an immunocompetent patient: A case report. IDCases 30. <https://doi.org/10.1016/j.idcr.2022.e01626>
85. Matias, W.R., Koshy, J.M., Nagami, E.H., Kovac, V., Moeng, L.R., Shenoy, E.S., Hooper, D.C., Madoff, L.C., Barshak, M.B., Johnson, J.A., Rowley, C.F., Julg, B., Hohmann, E.L., Lazarus, J.E., 2022. Tecovirimat for the Treatment of Human Monkeypox: An Initial Series From Massachusetts, United States. Open Forum Infect. Dis. 9. <https://doi.org/10.1093/ofid/ofac377>
86. Meseko, C., Adedeji, A., Shittu, I., Obishakin, E., Nanven, M., Suleiman, L., Okomah, D., Tyakaray, V., Kolade, D., Yinka-Ogunleye, A., Muhammad, S., Morgan, C.N., Matheny, A., Nakazawa, Y., McCollum, A., Doty, J.B., 2023. Orthopoxvirus Infections in Rodents, Nigeria, 2018-2019. Emerging Infectious Diseases 29, 433–434. <https://doi.org/10.3201/eid2902.221411>
87. Michel, J., Targosz, A., Rinner, T., Bourquain, D., Brinkmann, A., Sacks, J.A., Schaade, L., Nitsche, A., 2022. Evaluation of 11 commercially available PCR kits for the detection of monkeypox virus DNA, Berlin, July to September 2022. Eurosurveillance 27. <https://doi.org/10.2807/1560-7917.ES.2022.27.45.2200816>
88. Miranda, J.B., Borges, I.A., Campos, S.P.S., Vieira, F.N., De Ázara, T.M.F., Marques, F.A., Costa, G.B., Luis, A.P.M.F., De Oliveira, J.S., Ferreira, P.C.P., Bonjardim, C.A., Da Silva, S.L.M., Eiras, Á.E., Abrahão, J.S., Kroon, E.G., Drumond, B.P., Paglia, A.P., Trindade, G.S., 2017. Serologic and molecular evidence of vaccinia virus circulation among small mammals from different biomes, Brazil. Emerging Infectious Diseases 23, 931–938. <https://doi.org/10.3201/eid2306.161643>
89. Motlagh, Z.M., Mokhtari, A., Mahzounieh, M., 2016. Genomic identification of human vaccinia virus keratoconjunctivitis and its importance as a laboratory-acquired infection. Indian J. Ophthalmol. 64, 806–812. <https://doi.org/10.4103/0301-4738.195592>
90. Moussatché, N., Tuyama, M., Kato, S.E.M., Castro, A.P.V., Njaine, B., Peralta, R.H., Peralta, J.M., Damaso, C.R.A., Barroso, P.F., 2003. Accidental infection of laboratory worker with vaccinia virus. Emerg. Infect. Dis. 9, 724–726. <https://doi.org/10.3201/eid0906.020732>
91. Nagasse-Sugahara, T.K., Kisielius, J.J., Ueda-Ito, M., Curti, S.P., Figueiredo, C.A., Cruz, Á.S., Silva, M.M.J., Ramos, C.H., Silva, M.C.C., Sakurai, T., Salles-Gomes, L.F., 2004. Human vaccinia-like virus outbreaks in São Paulo and Goiás States, Brazil: Virus detection, isolation and identification. Rev. Inst. Med. Trop. Sao Paulo 46, 315–322. <https://doi.org/10.1590/s0036-46652004000600004>
92. Nakazawa, Y., Mauldin, M.R., Emerson, G.L., Reynolds, M.G., Lash, R.R., Gao, J., Zhao, H., Li, Y., Muyembe, J.-J., Kingebeni, P.M., Wemakoy, O., Malekani, J., Karem, K.L., Damon, I.K., Carroll, D.S., 2015. A phylogeographic investigation of African monkeypox. Viruses 7, 2168–2184. <https://doi.org/10.3390/v7042168>
93. Napoli, E., Frizzell, M., Gravell, C., Vallejo, S., Theodore, S., Chen, K., Siddiqui, H., Dunn, J., Marrufo, D., Cadena, J., Danaher, P.J., 2023. Eczema Monkeypoxicum in a Female Patient with Atopic Dermatitis. Open Forum Infect. Dis. 10. <https://doi.org/10.1093/ofid/ofad072>
94. Nörz, D., Tang, H.T., Emmerich, P., Giersch, K., Fischer, N., Schmiedel, S., Addo, M.M., Aepfelbacher, M., Pfefferle, S., Lütgehetmann, M., 2022. Rapid Adaptation of Established High-Throughput Molecular Testing Infrastructure for Monkeypox Virus Detection. Emerg. Infect. Dis. 28, 1765–1769. <https://doi.org/10.3201/eid2809.220917>
95. Ortiz-Martínez, Y., Rodríguez-Morales, A.J., Franco-Paredes, C., Chastain, D.B., Gharamti, A.A., Vargas Barahona, L., Henao-Martínez, A.F., 2022. Monkeypox – a description of the clinical progression of skin lesions: a case report from Colorado, USA. Ther. Adv. Infect. Dis. 9. <https://doi.org/10.1177/20499361221117726>
96. Osadebe, L., Hughes, C.M., Shongo Lushima, R., Kabamba, J., Nguete, B., Malekani, J., Pukuta, E., Karhemere, S., Muyembe Tamfum, J.-J., Wemakoy Okitolonda, E., Reynolds, M.G., McCollum, A.M., 2017. Enhancing case definitions for surveillance of human monkeypox in the Democratic Republic of Congo. PLoS. Negl. Trop. Dis. 11. <https://doi.org/10.1371/journal.pntd.0005857>
97. Paran, N., Lustig, S., Zvi, A., Erez, N., Israely, T., Melamed, S., Politi, B., Ben-Nathan, D., Schneider, P., Lachmi, B., Israeli, O., Stein, D., Levin, R., Olshevsky, U., 2013. Active vaccination with vaccinia virus A33 protects mice against lethal vaccinia and ectromelia viruses but not against cowpoxvirus; Elucidation of the specific adaptive immune response. Virology Journal 10. <https://doi.org/10.1186/1743-422X-10-229>
98. Park, C., Peng, C., Rahman, M.J., Haller, S.L., Tazi, L., Brennan, G., Rothenburg, S., 2021. RESEARCH ARTICLE Orthopoxvirus K3 orthologs show virus- And host-specific inhibition of the antiviral protein kinase PKR. PLoS Pathog. 17. <https://doi.org/10.1371/journal.ppat.1009183>
99. Patalon, T., Perez, G., Melamed, G., Wolf, T., Gazit, S., 2023. Mpox Infection in a Developed Country: A Case Report. Trop. Med. Infect. Dis. 8. <https://doi.org/10.3390/tropicalmed8010015>
100. Payne, R.O., Silk, S.E., Elias, S.C., Miura, K., Diouf, A., Galaway, F., De Graaf, H., Brendish, N.J., Poulton, I.D., Griffiths, O.J., Edwards, N.J., Jin, J., Labbé, G.M., Alanine, D.G.W., Siani, L., Marco, S.D., Roberts, R., Green, N., Berrie, E., Ishizuka, A.S., Nielsen, C.M., Bardelli, M., Partey, F.D., Ofori, M.F., Barfod, L., Wambua, J., Murungi, L.M., Osier, F.H., Biswas, S., McCarthy, J.S., Minassian, A.M., Ashfield, R., Viebig, N.K., Nugent, F.L., Douglas, A.D., Vekemans, J., Wright, G.J., Faust, S.N., Hill, A.V.S., Long, C.A., Lawrie, A.M., Draper, S.J., 2017. Human vaccination against RH5 induces neutralizing antimalarial antibodies that inhibit RH5 invasion complex interactions. JCI Insight 2. <https://doi.org/10.1172/jci.insight.96381>
101. Pelkonen, P.M., Tarvainen, K., Hynninen, A., Kallio, E.R.K., Henttonen, H., Palva, A., Vaheri, A., Vapalahti, O., 2003. Cowpox with Severe Generalized Eruption, Finland. Emerg. Infect. Dis. 9, 1458–1461. <https://doi.org/10.3201/eid0911.020814>
102. Pembi, E., Awang, S., Salaudeen, S.O., Agaba, I.A., Omoleke, S., 2022. First confirmed case of Monkeypox in Adamawa State, Nigeria: a clinico-epidemiological case report. Pan African Medical Journal 42. <https://doi.org/10.11604/pamj.2022.42.38.34715>
103. Pettke, A., Filén, F., Widgren, K., Jacks, A., Glans, H., Andreasson, S., Muradrasoli, S., Helgesson, S., Hauzenberger, E., Karlberg, M.L., Walai, N., Bjerkner, A., Gourlé, H., Gredmark-Russ, S., Lindsjö, O.K., Sondén, K., Asgeirsson, H., 2022. Ten-Week Follow-Up of Monkeypox Case-Patient, Sweden, 2022. Emerg. Infect. Dis. 28, 2074–2077. <https://doi.org/10.3201/eid2810.221107>
104. Pilna, H., Hajkova, V., Knitlova, J., Liskova, J., Elsterova, J., Melkova, Z., 2021. Vaccinia virus expressing interferon regulatory factor 3 induces higher protective immune responses against lethal poxvirus challenge in atopic organism. Viruses 13. <https://doi.org/10.3390/v13101986>
105. Pittman, P.R., Martin, J.W., Kingebeni, P.M., Tamfum, J.-J.M., Mwema, G., Wan, Q., Ewala, P., Alonga, J., Bilulu, G., Reynolds, M.G., Quinn, X., Norris, S., Townsend, M.B., Satheshkumar, P.S., Wadding, J., Soltis, B., Honko, A., Güereña, F.B., Korman, L., Patterson, K., Schwartz, D.A., Huggins, J.W., 2023. Clinical characterization and placental pathology of mpox infection in hospitalized patients in the Democratic Republic of the Congo. PLoS. Negl. Trop. Dis. 17. <https://doi.org/10.1371/journal.pntd.0010384>
106. Pomari, E., Mori, A., Accordini, S., Donini, A., Cordioli, M., Tacconelli, E., Castilletti, C., 2023. Evaluation of a ddPCR Commercial Assay for the Absolute Quantification of the Monkeypox Virus West Africa in Clinical Samples. Diagn. 13. <https://doi.org/10.3390/diagnostics13071349>
107. Poole, M., Mehrmal, S., Kremer, M., Guo, A.M., West, D.A., 2023. An atypical presentation of monkeypox associated with scrotal and penile shaft edema. JAAD Case Rep. 33, 36–38. <https://doi.org/10.1016/j.jdcr.2022.12.018>
108. Prkno, A., Hoffmann, D., Goerigk, D., Kaiser, M., van Maanen, A.C.F., Jeske, K., Jenckel, M., Pfaff, F., Vahlenkamp, T.W., Beer, M., Ulrich, R.G., Starke, A., Pfeffer, M., 2017. Epidemiological investigations of four cowpox virus outbreaks in alpaca herds, Germany. Viruses 9. <https://doi.org/10.3390/v9110344>
109. Proietti, I., Santoro, P.E., Skroza, N., Tieghi, T., Bernardini, N., Tolino, E., Dybala, A.E., Di Guardo, A., Rallo, A., Di Fraia, M., Rossi, M.F., Vitiello, M., Moscato, U., Pellacani, G., Lichtner, M., Potenza, C., 2022. A Case Report of Monkeypox in an Adult Patient from Italy: Clinical and Dermoscopic Manifestations, Diagnosis and Management. Vaccines 10. <https://doi.org/10.3390/vaccines10111903>
110. Quiner, C.A., Nakazawa, Y., 2017. Ecological niche modeling to determine potential niche of Vaccinia virus: A case only study. Int. J. Health Geogr. 16. <https://doi.org/10.1186/s12942-017-0100-1>
111. Quixabeira-Santos, J.C., Medaglia, M.L.G., Pescador, C.A., Damaso, C.R., 2011. Animal movement and establishment of vaccinia virus Cantagalo Strain in Amazon Biome, Brazil. Emerg. Infect. Dis. 17, 726–729. <https://doi.org/10.3201/eid1704.101581>
112. Rahimi, F.S., Afaghi, S., Tarki, F.E., Moeinabadi-Bidgoli, K., Golmohammadi, M., Alamdari, N.M., Besharat, S., 2022. The Historical Epidemiology of Human Monkeypox: A Review of Evidence from the 1970 Emergence to the 2022 Outbreak. Tohoku J. Exp. Med. 258, 243–255. <https://doi.org/10.1620/tjem.2022.J081>
113. Raman, S.C., Mejías-Pérez, E., Gomez, C.E., García-Arriaza, J., Perdiguero, B., Vijayan, A., Pérez-Ruiz, M., Cuervo, A., Santiago, C., Sorzano, C.O.S., Sánchez-Corzo, C., Moog, C., Burger, J.A., Schorcht, A., Sanders, R.W., Carrascosa, J.L., Esteban, M., 2019. The Envelope-Based Fusion Antigen GP120C14K Forming Hexamer-Like Structures Triggers T Cell and Neutralizing Antibody Responses Against HIV-1. Front. Immunol. 10. <https://doi.org/10.3389/fimmu.2019.02793>
114. Reed, K.D., Melski, J.W., Graham, M.B., Regnery, R.L., Sotir, M.J., Wegner, M.V., Kazmierczak, J.J., Stratman, E.J., Li, Y., Fairley, J.A., Swain, G.R., Olson, V.A., Sargent, E.K., Kehl, S.C., Frace, M.A., Kline, R., Foldy, S.L., Davis, J.P., Damon, I.K., 2004. The Detection of Monkeypox in Humans in the Western Hemisphere. N Engl J Med 350, 342–350. <https://doi.org/10.1056/NEJMoa032299>
115. Reeman, S., Gates, A.J., Pulford, D.J., Krieg, A., Ulaeto, D.O., 2017. Protection of mice from lethal vaccinia virus infection by vaccinia virus protein subunits with a CpG adjuvant. Viruses 9. <https://doi.org/10.3390/v9120378>
116. Reynolds, M.G., Davidson, W.B., Curns, A.T., Conover, C.S., Huhn, G., Davis, J.P., Wegner, M., Croft, D.R., Newman, A., Obiesie, N.N., Hansen, G.R., Hays, P.L., Pontones, P., Beard, B., Teclaw, R., Howell, J.F., Braden, Z., Holman, R.C., Karem, K.L., Damon, I.K., 2007. Spectrum of infection and risk factors for human monkeypox, United States, 2003. Emerging Infectious Diseases 13, 1332–1339. <https://doi.org/10.3201/eid1309.070175>
117. Rodríguez, B.S., Guzmán Herrador, B.R., Franco, A.D., Sánchez-Seco Fariñas, M.P., del Amo Valero, J., Aginagalde Llorente, A.H., Pérez de Agreda, J.P.A., Malonda, R.C., Castrillejo, D., Chirlaque López, M.D., Chong Chong, E.J., Balbuena, S.F., García, V.G., García-Cenoz, M., Hernández, L.G., Montalbán, E.G., Carril, F.G., Cortijo, T.G., Bueno, S.J., Sánchez, A.L., Linares Dópido, J.A., Lorusso, N., Martins, M.M., Martínez Ochoa, E.M., Mateo, A.M., Peña, J.M., Negredo Antón, A.I., Otero Barrós, M.T., del Carmen Pacheco Martinez, M., Jiménez, P.P., Pérez Martín, O.-G., Rivas Pérez, A.I., García, M.S., Soria, F.S., Sierra Moros, M.J., Brandini Romersi, A.M., Lozano, C.G., Vallejo-Plaza, A., Campelli, G.S., Balader, P.S., San Miguel, L.G., Cano, E.A., Ruiz-Algueró, M., Simón, L., Arias, P., Vázquez, A., Sánchez, P., Herrero, L., Molero, F., Torres, M., Sánchez, L., Cejudo, C., Polo, R., Castellá, J.G., Koerting, A., Vazquez Rincon, I.M., Ugarriza, A.V., Remacha, C.M., Boone, A.L., Huerta, M.H., Riutort, A.N., Torres Lana, Á.L., Herrera, A.A., García, I.F., Guijarro, M.V., Duran, G.R., Marín, V.R., Saavedra, M.R.R., Arribas, S.F., Rodríguez, H.M., Calvo, N.R., Rio, V.A., Garzón, N.G., Martínez-Pino, I., Jesús Rodríguez Recio, M., Roig Sena, F.J., Pública, S., del Mar López-Tercero Torvisco, M., del Carmen García Bañobre, M., del Pilar Sánchez Castro, M., Martínez Soto, M.R., García, M.A., Martínez, F.M., Jose Domínguez Rodríguez, M., Morales, L.M., Navarro, A.H., Deorador, E.C., Forte, A.N., Julia, A.N., Largo, N.C., Ortíz, C.S., Marín, N.G., Díaz, J.S., Belen, M., Zarzuelo, R., Pariente, N.M., del Buey, J.F.B., Velasco Rodríguez, M.J., Peña, A.A., Baena, E.R., Benito, A.M., Meixeira, A.P., Martinez, J.I., Ordobas, M., Arce, A., Naranjo, A.S.-M., Castilla, J., Casado, I., Burgui, C., Egües, N., Ezpeleta, G., Carollo, O.M., Larraitz, A., Arricibita, E.H., Ibáñez Pérez, A.C., 2022. Epidemiologic Features and Control Measures during Monkeypox Outbreak, Spain, June 2022. Emerg. Infect. Dis. 28, 1847–1851. <https://doi.org/10.3201/EID2809.221051>
118. Rodriguez-Nava, G., Kadlecik, P., Filardo, T.D., Ain, D.L., Cooper, J.D., McCormick, D.W., Webber, B.J., O’Laughlin, K., Petersen, B.W., Narasimhan, S., Sahni, H.K., 2022. Myocarditis Attributable to Monkeypox Virus Infection in 2 Patients, United States, 2022. Emerg. Infect. Dis. 28, 2508–2512. <https://doi.org/10.3201/eid2812.221276>
119. Rosone, F., Sala, M.G., Cardeti, G., Rombolà, P., Cittadini, M., Carnio, A., Giordani, R., Scicluna, M.T., 2021. Sero-epidemiological survey of orthopoxvirus in stray cats and in different domestic, wild and exotic animal species of central Italy. Viruses 13. <https://doi.org/10.3390/v13102105>
120. Sallam, M., Eid, H., Awamleh, N., Al-Tammemi, A.B., Barakat, M., Athamneh, R.Y., Hallit, S., Harapan, H., Mahafzah, A., 2022. Conspiratorial Attitude of the General Public in Jordan towards Emerging Virus Infections: A Cross-Sectional Study Amid the 2022 Monkeypox Outbreak. Trop. Med. Infect. Dis. 7. <https://doi.org/10.3390/tropicalmed7120411>
121. Sanromán Guerrero, M.A., Sánchez, E.H., Ruanes, B.D.N., Fernández-González, P., Ugalde, S.A., Leal, A.G., Fernández, M.S., Rodríguez, J.J.A., Martinez Garcia, L., Escudero, R., Méndez, M.Á.F., Zamorano Gómez, J.L., Llorente, B.M., Vivancos-Gallego, M.J., 2023. Case report: From monkeypox pharyngitis to myopericarditis and atypical skin lesions. Front. Cardiovasc. Med. 9. <https://doi.org/10.3389/fcvm.2022.1046498>
122. Seang, S., Burrel, S., Todesco, E., Leducq, V., Monsel, G., Le Pluart, D., Cordevant, C., Pourcher, V., Palich, R., 2022. Evidence of human-to-dog transmission of monkeypox virus. The Lancet 400, 658–659. <https://doi.org/10.1016/S0140-6736(22)01487-8>
123. Shah, H.H., Molani, M.K., Shabbir, N., 2023. Human monkeypox — After 40 years, an unintended consequence of smallpox eradication. Frontiers in Public Health 10. <https://doi.org/10.3389/fpubh.2022.1082586>
124. Shchelkunov, S.N., Sergeev, A.A., Yakubitskiy, S.N., Titova, K.A., Pyankov, S.A., Kolosova, I.V., Starostina, E.V., Borgoyakova, M.B., Zadorozhny, A.M., Kisakov, D.N., Shulgina, I.S., Karpenko, L.I., 2021a. Adaptive immune response to vaccinia virus livp infection of balb/c mice and protection against lethal reinfection with cowpox virus. Viruses 13. <https://doi.org/10.3390/v13081631>
125. Shchelkunov, S.N., Yakubitskiy, S.N., Titova, K.A., Pyankov, S.A., Sergeev, A.A., 2021b. Enhancing the protective immune response to administration of a livp-gfp live attenuated vaccinia virus to mice. Pathogens 10. <https://doi.org/10.3390/pathogens10030377>
126. Shenouda, M.M., Noyce, R.S., Lee, S.Z., Wang, J.L., Lin, Y.-C., Favis, N.A., Desaulniers, M.A., Evans, D.H., 2022. The mismatched nucleotides encoded in vaccinia virus flip-And-flop hairpin telomeres serve an essential role in virion maturation. PLoS Pathogens 18. <https://doi.org/10.1371/journal.ppat.1010392>
127. Simões, P., Bhagani, S., 2022. A viewpoint: The 2022 monkeypox outbreak. J. Virus Erad. 8. <https://doi.org/10.1016/j.jve.2022.100078>
128. Soheili, M., Nasseri, S., Afraie, M., Khateri, S., Moradi, Y., Mortazavi, S.M.M., Kohan, H.G., 2022. Monkeypox: Virology, Pathophysiology, Clinical Characteristics, Epidemiology, Vaccines, Diagnosis, and Treatments. Journal of Pharmacy and Pharmaceutical Sciences 25, 297–322. <https://doi.org/10.18433/jpps33138>
129. Stagegaard, J., Kurth, A., Stern, D., Dabrowski, P.W., Pocknell, A., Nitsche, A., Schrick, L., 2017. Seasonal recurrence of cowpox virus outbreaks in captive cheetahs (Acinonyx jubatus). PLoS ONE 12. <https://doi.org/10.1371/journal.pone.0187089>
130. Styczynski, A., Burgado, J., Walteros, D., Usme-Ciro, J., Laiton, K., Farias, A.P., Nakazawa, Y., Chapman, C., Davidson, W., Mauldin, M., Morgan, C., Martínez-Cerón, J., Patiña, E., Sepúlveda, L.L.L., Torres, C.P., Suarez, A.E.C., Olaya, G.P., Riveros, C.E., Cepeda, D.Y., Lopez, L.A., Espinosa, D.G., Lozada, F.A.G., Li, Y., Satheshkumar, P.S., Reynolds, M., Gracia-Romero, M., Petersen, B., 2019. Seroprevalence and risk factors possibly associated with emerging zoonotic vaccinia virus in a farming community, Colombia. Emerging Infectious Diseases 25, 2169–2176. <https://doi.org/10.3201/eid2512.181114>
131. Świtaj, K., Kajfasz, P., Kurth, A., Nitsche, A., 2015. Cowpox after a cat scratch – case report from Poland. Annals of Agricultural and Environmental Medicine 22, 456–458. <https://doi.org/10.5604/12321966.1167713>
132. Teferi, W.M., Desaulniers, M.A., Noyce, R.S., Shenouda, M., Umer, B., Evans, D.H., 2017. The vaccinia virus K7 protein promotes histone methylation associated with heterochromatin formation. PLoS ONE 12. <https://doi.org/10.1371/journal.pone.0173056>
133. Thomassen, H.A., Fuller, T., Asefi-Najafabady, S., Shiplacoff, J.A.G., Mulembakani, P.M., Blumberg, S., Johnston, S.C., Kisalu, N.K., Kinkela, T.L., Fair, J.N., Wolfe, N.D., Shongo, R.L., LeBreton, M., Meyer, H., Wright, L.L., Muyembe, J.-J., Buermann, W., Okitolonda, E., Hensley, L.E., Lloyd-Smith, J.O., Smith, T.B., Rimoin, A.W., 2013. Pathogen-Host Associations and Predicted Range Shifts of Human Monkeypox in Response to Climate Change in Central Africa. PLoS ONE 8. <https://doi.org/10.1371/journal.pone.0066071>
134. Trindade, G.S., Emerson, G.L., Carroll, D.S., Kroon, E.G., Damon, I.K., 2007. Brazilian vaccinia viruses and their origins. Emerging Infectious Diseases 13, 965–972. <https://doi.org/10.3201/eid1307.061404>
135. Vandenbogaert, M., Kwasiborski, A., Gonofio, E., Descorps‐Declère, S., Selekon, B., Nkili Meyong, A.A., Ouilibona, R.S., Gessain, A., Manuguerra, J.-C., Caro, V., Nakoune, E., Berthet, N., 2022. Nanopore sequencing of a monkeypox virus strain isolated from a pustular lesion in the Central African Republic. Scientific Reports 12. <https://doi.org/10.1038/s41598-022-15073-1>
136. Vauhkonen, H., Kallio-Kokko, H., Hiltunen-Back, E., Lönnqvist, L., Leppäaho-Lakka, J., Mannonen, L., Kant, R., Sironen, T., Kurkela, S., Lappalainen, M., Zorec, T.M., Zakotnik, S., Vlaj, D., Korva, M., Avšič-Županc, T., Poljak, M., Smura, T., Vapalahti, O., 2023. Intrahost Monkeypox Virus Genome Variation in Patient with Early Infection, Finland, 2022. Emerg. Infect. Dis. 29, 649–652. <https://doi.org/10.3201/eid2903.221388>
137. Vierbaum, L., Wojtalewicz, N., Kaufmann, A., Goseberg, S., Kaiser, P., Grunert, H.-P., Dühring, U., Zimmermann, A., Scholz, A., Michel, J., Nitsche, A., Rabenau, H.F., Obermeier, M., Schellenberg, I., Zeichhardt, H., Kammel, M., 2023. Results of the first German external quality assessment scheme for the detection of monkeypox virus DNA. PLoS ONE 18. <https://doi.org/10.1371/journal.pone.0285203>
138. Vivancos-Gallego, M.J., Sánchez-Conde, M., Rodríguez-Domínguez, M., Fernandez-Gonzalez, P., Martínez-García, L., Garcia-Mouronte, E., Martínez-Sanz, J., Moreno-Zamora, A.M., Casado, J.L., Ron, R., Galán, J.C., Pérez-Elías, M.J., Moreno, S., 2022. Human Monkeypox in People With HIV: Transmission, Clinical Features, and Outcome. Open Forum Infect. Dis. 9. <https://doi.org/10.1093/ofid/ofac557>
139. Weber, S., Jeske, K., Ulrich, R.G., Imholt, C., Jacob, J., Beer, M., Hoffmann, D., 2020. In vivo characterization of a bank vole-derived cowpox virus isolate in natural hosts and the rat model. Viruses 12. <https://doi.org/10.3390/v12020237>
140. Wegner, G.I., 2022. Averting wildlife-borne infectious disease epidemics requires a focus on socio-ecological drivers and a redesign of the global food system 47.
141. Wenham C, Eccleston-Turner M. Monkeypox as a PHEIC: implications for global health governance. Lancet. 2022 Dec 17;400(10369):2169-2171. doi: 10.1016/S0140-6736(22)01437-4. Epub 2022 Aug 1. PMID: 35926551; PMCID: PMC9342918.
142. Whitehouse, E.R., Bonwitt, J., Hughes, C.M., Lushima, R.S., Likafi, T., Nguete, B., Kabamba, J., Monroe, B., Doty, J.B., Nakazawa, Y., Damon, I., Malekani, J., Davidson, W., Wilkins, K., Li, Y., Radford, K.W., Schmid, D.S., Pukuta, E., Muyamuna, E., Karhemere, S., Tamfum, J.-J.M., Okitolonda, E.W., McCollum, A.M., Reynolds, M.G., 2021. Clinical and Epidemiological Findings from Enhanced Monkeypox Surveillance in Tshuapa Province, Democratic Republic of the Congo During 2011–2015. The Journal of Infectious Diseases 223, 1870–1878. <https://doi.org/10.1093/infdis/jiab133>
143. Woldehanna, S., Zimicki, S., 2015. An expanded One Health model: Integrating social science and One Health to inform study of the human-animal interface. Social Science & Medicine 129, 87–95. <https://doi.org/10.1016/j.socscimed.2014.10.059>
144. Yang, Z., Gray, M., Winter, L., 2021. Why do poxviruses still matter? Cell Biosci 11, 96. <https://doi.org/10.1186/s13578-021-00610-8>
145. Yinka-Ogunleye, A., Aruna, O., Dalhat, M., Ogoina, D., McCollum, A., Disu, Y., Mamadu, I., Akinpelu, A., Ahmad, A., Burga, J., Ndoreraho, A., Nkunzimana, E., Manneh, L., Mohammed, A., Adeoye, O., Tom-Aba, D., Silenou, B., Ipadeola, O., Saleh, M., Adeyemo, A., Nwadiutor, I., Aworabhi, N., Uke, P., John, D., Wakama, P., Reynolds, M., Mauldin, M.R., Doty, J., Wilkins, K., Musa, J., Khalakdina, A., Adedeji, A., Mba, N., Ojo, O., Krause, G., Ihekweazu, C., Mandra, A., Davidson, W., Olson, V., Li, Y., Radford, K., Zhao, H., Townsend, M., Burgado, J., Satheshkumar, P.S., 2019. Outbreak of human monkeypox in Nigeria in 2017–18: a clinical and epidemiological report. The Lancet Infectious Diseases 19, 872–879. <https://doi.org/10.1016/S1473-3099(19)30294-4>
146. Yong, S.E.F., Ng, O.T., Ho, Z.J.M., Mak, T.M., Marimuthu, K., Vasoo, S., Yeo, T.W., Ng, Y.K., Cui, L., Ferdous, Z., Chia, P.Y., Aw, B.J.W., Manauis, C.M., Low, C.K.K., Chan, G., Peh, X., Lim, P.L., Chow, L.P.A., Chan, M., Lee, V.J.M., Lin, R.T.P., Heng, M.K.D., Leo, Y.S., 2020. Imported monkeypox, Singapore. Emerging Infectious Diseases 26, 1826–1830. <https://doi.org/10.3201/eid2608.191387>
